# Supplementary material
Source: Springer Nature journal article supplement (https://www.springermedizin.de/resource/supplementary/12974_2011_379_MOESM3_ESM.pdf/9601552)

**DMSO**

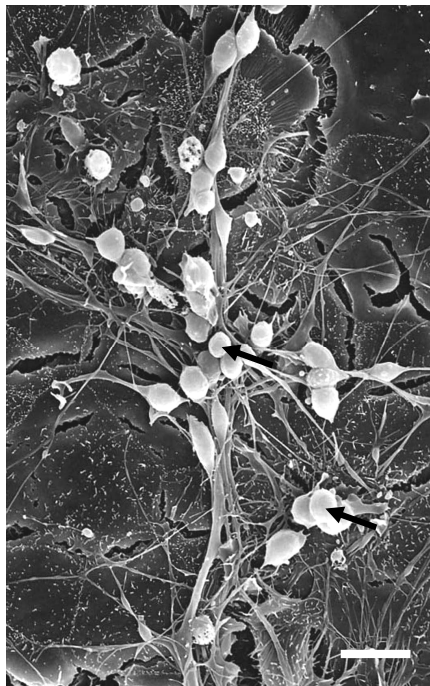

**210 nM C16**

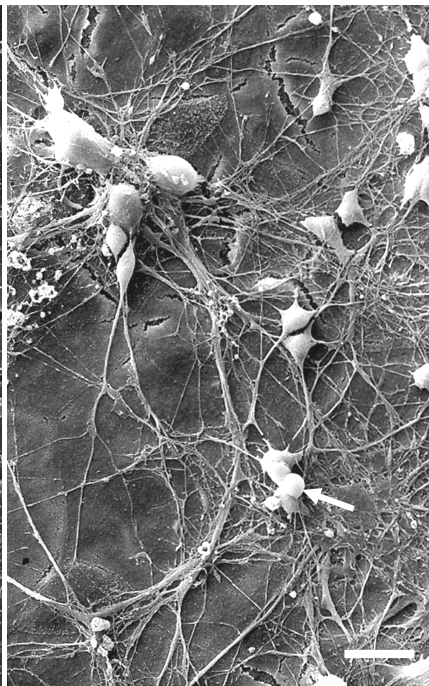

**1  $\mu$ M C16**

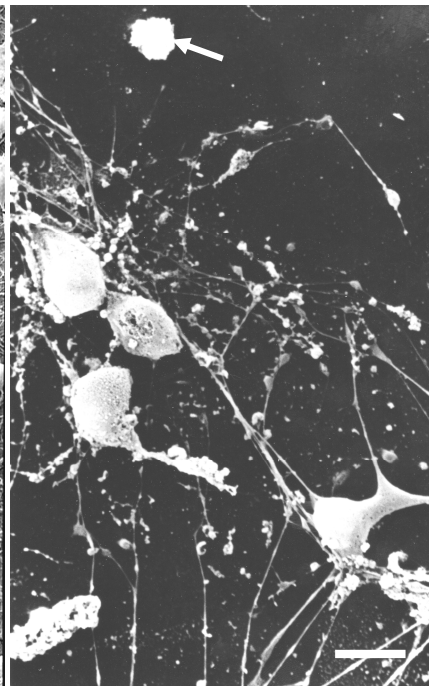

Supplement: MOESM3 [file 9601552]
